# Supplementary material for: Impact of Personal Protective Equipment on Out-of-Hospital Cardiac Arrest Resuscitation in Coronavirus Pandemic
Source: MDPI journal article supplement (doi:10.3390/medicina57121291), 2021-11-24
Supplement: s1 [file s1]

## Supplementary Material

**Table S1. Baseline characteristics of the survey respondents**

|                                                             | MD<br>N=27 | RN+EMT<br>N=40 | Total<br>N=67 |
|-------------------------------------------------------------|------------|----------------|---------------|
| <b>Age in years, mean (SD)</b>                              | 34.2 (6.9) | 30.0 (4.3)     | 31.7 (5.8)    |
| <b>Males, N (%)</b>                                         | 14 (51.8%) | 8 (20.0%)      | 22 (32.8%)    |
| <b>Experience as emergency department worker, N (%)</b>     |            |                |               |
| ≤2 years                                                    | 8 (29.6%)  | 6 (15.0%)      | 14 (20.9%)    |
| >2 and ≤5 years                                             | 8 (29.6%)  | 14 (35.0%)     | 22 (32.8%)    |
| >5 and ≤10 years                                            | 3 (11.1%)  | 13 (32.5%)     | 16 (23.9%)    |
| >10 years                                                   | 8 (29.6%)  | 7 (17.5%)      | 15 (22.4%)    |
| <b>Type of CPR certification, N (%)</b>                     |            |                |               |
| BLS provider                                                | 12 (44.4%) | 27 (67.5%)     | 39 (58.2%)    |
| BLS instructor                                              | 4 (14.8%)  | 2 (5.0%)       | 6 (9.0%)      |
| ACLS provider                                               | 19 (70.4%) | 26 (65.0%)     | 45 (67.2%)    |
| ACLS instructor                                             | 7 (25.9%)  | 3 (7.5%)       | 10 (14.9%)    |
| PALS provider                                               | 1 (3.7%)   | 5 (12.5%)      | 6 (9.0%)      |
| <b>Number of CPR performances while wearing PAPR, N (%)</b> |            |                |               |
| <10 times                                                   | 13 (48.5%) | 23 (57.5%)     | 36 (53.7%)    |
| 10–19 times                                                 | 9 (33.3%)  | 14 (35.0%)     | 23 (34.3%)    |
| ≥20 times                                                   | 5 (18.5%)  | 3 (7.5%)       | 8 (11.9%)     |

MD, medical doctor; RN, registered nurse; EMT, emergency medical technician; SD, standard deviation; CPR, cardiopulmonary resuscitation; BLS, basic life support; ACLS, advanced cardiovascular life support; PALS, pediatric advanced life support; PAPR, powered air purifying respiratory

**Table S2. Survey questions and answers on wearing powered air purifying respirator during resuscitation of out-of-hospital cardiac arrest patients**

| Questions                                                                                                                | Survey scores, Mean (SD) |              |                  |         |
|--------------------------------------------------------------------------------------------------------------------------|--------------------------|--------------|------------------|---------|
|                                                                                                                          | Total<br>(N=67)          | MD<br>(N=27) | RN+EMT<br>(N=40) | P-value |
| <b>Q1. Health care workers' performance on the following procedures was negatively affected by wearing enhanced PPE.</b> |                          |              |                  |         |
| 1. Overall quality in CPR performance                                                                                    | 3.7 (0.9)                | 4.0 (0.9)    | 3.5 (0.9)        | 0.039   |
| 2. Intubation                                                                                                            | 3.6 (0.9)                | 3.8 (0.8)    | 3.4 (0.9)        | 0.108   |
| 3. Intravenous line                                                                                                      | 3.4 (1.0)                | 3.6 (0.8)    | 3.3 (1.1)        | 0.262   |
| 4. ABGA                                                                                                                  | 3.1 (1.0)                | 3.3 (0.8)    | 3.0 (1.1)        | 0.203   |
| 5. Chest compression                                                                                                     | 3.5 (0.9)                | 3.6 (0.9)    | 3.5 (0.9)        | 0.686   |
| 6. Medication administration                                                                                             | 2.7 (1.0)                | 3.1 (0.8)    | 2.5 (1.0)        | 0.009   |
| 7. Defibrillation                                                                                                        | 2.7 (1.0)                | 3.0 (0.9)    | 2.5 (1.0)        | 0.081   |
| 8. Patient monitoring                                                                                                    | 2.7 (1.0)                | 3.0 (1.0)    | 2.5 (1.0)        | 0.074   |
| 9. Resuscitation instruction                                                                                             | 3.8 (0.8)                | 3.9 (0.9)    | 3.8 (0.8)        | 0.699   |
| <b>Q2. It was easy to don and doff.</b>                                                                                  | 2.0 (0.8)                | 2.0 (0.9)    | 2.1 (0.7)        | 0.705   |
| <b>Q3. It was comfortable to breathe.</b>                                                                                | 4.1 (1.0)                | 4.1 (1.2)    | 4.1 (0.8)        | 0.803   |
| <b>Q4. It suppressed heat buildup appropriately.</b>                                                                     | 3.7 (1.2)                | 4.0 (1.1)    | 3.5 (1.3)        | 0.093   |
| <b>Q5. Contact with contaminants seemed to be reduced.</b>                                                               | 4.2 (0.8)                | 4.3 (0.7)    | 4.1 (0.8)        | 0.234   |
| <b>Q6. It was easy to secure a clear vision.</b>                                                                         | 2.4 (1.0)                | 2.6 (1.1)    | 2.3 (1.0)        | 0.239   |
| <b>Q7. There were difficulties in communication between the medical staff.</b>                                           | 4.4 (0.9)                | 4.4 (1.1)    | 4.4 (0.8)        | 0.584   |
| <b>Q8. The movement was limited.</b>                                                                                     | 3.9 (0.9)                | 3.7 (1.0)    | 4.0 (0.7)        | 0.140   |
| <b>Q9. It impeded each other's movements among the medical staff.</b>                                                    | 3.9 (1.0)                | 3.7 (1.1)    | 4.1 (0.8)        | 0.160   |
| <b>Q10. There is a risk of contamination when doffing.</b>                                                               | 3.5 (0.9)                | 3.4 (0.9)    | 3.6 (0.9)        | 0.639   |

MD, medical doctor; RN, registered nurse; EMT, emergency medical technician; SD, standard deviation; CPR, cardiopulmonary resuscitation; ABGA, arterial blood gas analysis; PAPR, powered air purifying respirator

**Table S3. Survey questions and answers regarding the necessity of wearing powered air purifying respirator and their reasons**

|                                                                                                                    | N  | %    |
|--------------------------------------------------------------------------------------------------------------------|----|------|
| <b>Do you think enhanced PPE is necessary during the resuscitation of OHCA patients? (Yes)</b>                     | 61 | 91.0 |
| <b>Why do you think PAPR is <u>necessary</u> during the resuscitation of OHCA patients?</b>                        |    |      |
| A. We can participate in patient management feeling self-protected                                                 | 27 | 44.3 |
| B. It has a positive impact on the reduction of infection rates                                                    | 24 | 39.3 |
| C. We need overprotection in this situation though I am not sure whether it will help to reduce the infection rate | 15 | 24.6 |
| <b>Why do you think PAPR is <u>unnecessary</u> in the resuscitation process of OHCA patients?</b>                  | 5  | 7.5  |
| A. Conventional PPE is sufficient                                                                                  | 4  | 80.0 |
| B. I think the probability of being infected with COVID-19 from patients with OHCA is very low                     | 1  | 20.0 |
| C. Too many resources required such as cost/equipment management                                                   | 3  | 60.0 |
| D. Disadvantages in medical treatment caused by cumbersome PPE outweigh the advantages                             | 3  | 60.0 |

PAPR, powered air purifying respirator; PPE, personal protective equipment; OHCA, out-of-hospital cardiac arrest; COVID-19, coronavirus disease

**Table S4. Free opinions on the use of enhanced personal protective equipment (advantages, disadvantages, and improvement plan in use)**

|                                                                                                            | N  |
|------------------------------------------------------------------------------------------------------------|----|
| <b>Negative opinions</b>                                                                                   |    |
| Difficulty in communication due to the noise of the device                                                 | 24 |
| Self-contamination risk when doffing                                                                       | 10 |
| Battery life issue                                                                                         | 9  |
| Difficulty in auscultation                                                                                 | 8  |
| The long donning and doffing times cause a delay in starting CPR                                           | 7  |
| Relative CPR manpower shortage due to the lack of PAPR quantity                                            | 7  |
| Discomfort when donning and doffing                                                                        | 4  |
| Concerns about fan malfunction and machine failure                                                         | 4  |
| Necessity of equipment inspection and re-setting before and after CPR                                      | 3  |
| Problems with medical treatment due to limited movement                                                    | 3  |
| Assistance and monitoring are required when donning and doffing                                            | 2  |
| Difficulty in securing visibility                                                                          | 2  |
| Dull feeling when moving, interruption between medical personnel while moving                              | 2  |
| Dangerous for those who wear glasses because the glasses come off when doffing                             | 2  |
| N95 masks slipped off when doffing the hood                                                                | 2  |
| Simulation training is required regularly to prevent CPR quality loss                                      | 2  |
| Concerns about equipment obsolescence due to equipment reuse                                               | 2  |
| Poor durability of PAPR hood                                                                               | 1  |
| PAPR hood keeps coming off                                                                                 | 1  |
| Headache caused by machine noise                                                                           | 1  |
| PAPR hood size adjustment is difficult                                                                     | 1  |
| Protection is questionable because the fitting test is not performed                                       | 1  |
| Inconvenient during patient history taking and recording EMR                                               | 1  |
| <b>Positive opinions</b>                                                                                   |    |
| Wearing PAPR helps to prevent infection                                                                    | 2  |
| Temperature control is easy, so we can work comfortably in CPR situations                                  | 1  |
| It was easy to breathe while wearing PAPR hood                                                             | 1  |
| PAPR, powered air purifying respirator; CPR, cardiopulmonary resuscitation; EMR; Electronic medical record |    |
